# Supplementary material
Source: ML conference proceedings conference paper supplement (https://openreview.net/forum?id=zQOYGDc9pu)
Supplement: supplementary_material [file attachment]

---

# Optimized Covariance Design for AB Test on Social Network under Interference

## APPENDIX ONLY

---

Anonymous Author(s)

Affiliation

Address

email

### 1 A Proofs

#### 2 A.1 Proof of Proposition 1

3 Firstly, we notice that

$$\mathbb{E}[z_i] = \frac{1}{2} \quad \text{Var}[z_i] = E[z_i] - E[z_i]^2 = \frac{1}{4} \quad (1)$$

4 Then we substitute  $Y_i(\mathbf{z})$  in HT estimator

$$\hat{\tau} = \frac{1}{n} \sum_{i \in [n]} \left( \left( \frac{z_i}{\mathbb{E}[z_i]} - \frac{(1 - z_i)}{\mathbb{E}[1 - z_i]} \right) Y_i(z) \right) \quad (2)$$

5 with our potential outcome model and take expectation w.r.t. treatment assignments,

$$\begin{aligned} \mathbb{E}[\hat{\tau}] &= \frac{2}{n} \left( \sum_{i=1}^n \mathbb{E}[(z_i - (1 - z_i))Y_i(z)] \right) \\ &= \frac{2}{n} \sum_{i=1}^n \left( \alpha_i \mathbb{E}[2z_i - 1] + \beta_i \mathbb{E}[z_i^2] + \gamma \sum_{j \in N_i} \mathbb{E}[(2z_i - 1)z_j] \right) \\ &= \frac{2}{n} \sum_{i=1}^n \left( \beta_i \mathbb{E}[z_i] + 2\gamma \text{Cov}[z_i, \sum_{j \in N_i} z_j] \right) \\ &= \frac{1}{n} \sum_{i=1}^n \left( \beta_i + 4\gamma \text{Cov}[z_i, \sum_{j \in N_i} z_j] \right) \end{aligned} \quad (3)$$

6 Moreover, we can calculate the GATE under our potential outcome model

$$\tau = \frac{1}{n} \sum_{i=1}^n (Y_i(\mathbf{1}) - Y_i(\mathbf{0})) = \frac{1}{n} \sum_{i=1}^n (\beta_i + \gamma d_i) \quad (4)$$

7 Hence, the bias of HT estimator is

$$\begin{aligned} E[\hat{\tau}] - \tau &= \frac{1}{n} \sum_{i=1}^n \left( 4\gamma \text{Cov}[z_i, \sum_{j \in N_i} z_j] - \gamma d_i \right) \\ &= \frac{\gamma}{n} \sum_{i=1}^n \left( \frac{\text{Cov}[z_i, \sum_{j \in N_i} z_j]}{\text{Var}[z_i]} - d_i \right) \end{aligned} \quad (5)$$

8 Then we derive the matrix form with cluster-level treatment vector  $\mathbf{t}$ .

$$\begin{aligned}
\mathbb{E}[\hat{\tau}] - \tau &= \frac{\gamma}{n} \sum_{i=1}^n \left( \frac{\text{Cov}[z_i, \sum_{k \in \mathcal{N}_i} z_k]}{\text{Var}[z_i]} - d_i \right) \\
&= \frac{\gamma}{n} \left( 4 \sum_{i \neq j \in [K]} \text{Cov}[t_i, t_j] \mathbf{C}_{ij} - \sum_{i \in [n]} d_i \right) \\
&= \frac{\gamma}{n} \left( 4 \sum_{i,j \in [K]} \text{Cov}[t_i, t_j] \mathbf{C}_{ij} - \sum_{i,j \in [K]} \mathbf{C}_{ij} \right) \\
&= \frac{\gamma}{n} \left( 4 \text{trace}(\mathbf{C} \text{Cov}[\mathbf{t}]) - \sum_{i,j \in [K]} \mathbf{C}_{ij} \right)
\end{aligned} \tag{6}$$

## 9 A.2 Proof of Proposition 2

10 Firstly we rewrite the estimator

$$\begin{aligned}
\hat{\tau} &= \frac{2}{n} \sum_{i \in [n]} \left( (\beta_i - \gamma d_i) z_i + 2\gamma \sum_{j \in \mathcal{N}_i} z_i z_j \right) \\
&= \frac{2}{n} \left( \sum_{i \in [n]} (\beta_i - \gamma d_i) z_i + 2\gamma \sum_{(j,k) \in \mathcal{E}} z_i z_j \right)
\end{aligned} \tag{7}$$

11 We then expand the variance directly, and get

$$\begin{aligned}
\text{Var}[\hat{\tau}] &= \frac{4}{n^2} \left( \sum_{i,j \in [n]} (\beta_i - \gamma d_i)(\beta_j - \gamma d_j) \text{Cov}[z_i, z_j] \right. \\
&\quad + \sum_{i \in [n]} \sum_{(j,k) \in \mathcal{E}} 4\gamma(\beta_i - \gamma d_i) \text{Cov}[z_i, z_j z_k] \\
&\quad \left. + \sum_{(i,j) \in \mathcal{E}} \sum_{(k,l) \in \mathcal{E}} 4\gamma^2 \text{Cov}[z_i z_j, z_k z_l] \right)
\end{aligned} \tag{8}$$

12 then we write it as matrix form with cluster-level treatment vector  $\mathbf{t}$ ,

$$\hat{\tau} = \frac{2}{n} (\mathbf{h}^T \mathbf{t} + 2\gamma \mathbf{t}^T \mathbf{C} \mathbf{t}) \tag{9}$$

13 and expand the variance as covariance, we get the desired format

$$\begin{aligned}
\text{Var}[\hat{\tau}] &= \frac{4}{n^2} (\text{trace}(\mathbf{h} \mathbf{h}^T \text{Cov}[\mathbf{t}]) + 4\gamma \text{Cov}[\mathbf{h}^T \mathbf{t}, \mathbf{t}^T \mathbf{C} \mathbf{t}] \\
&\quad + 4\gamma^2 \text{Var}[\mathbf{t}^T \mathbf{C} \mathbf{t}])
\end{aligned} \tag{10}$$

## 14 A.3 Proof of Proposition 3

15 Firstly we consider the estimator of matrix form again

$$\hat{\tau} = \frac{2}{n} (\mathbf{h}^T \mathbf{t} + 2\gamma \mathbf{t}^T \mathbf{C} \mathbf{t}) \tag{11}$$

16 Since our assumption can't guarantee  $\mathbb{E}[\hat{\tau}] > 0$  always hold, we drop the square of expectation term,  
17 namely

$$\text{Var}[\hat{\tau}] = \mathbb{E}[\hat{\tau}^2] - \mathbb{E}[\hat{\tau}]^2 \leq \mathbb{E}[\hat{\tau}^2] \tag{12}$$

18 Notice that all elements of matrix  $E[\mathbf{t} \mathbf{t}^T]$  is non-negative, we have

$$\mathbf{h}^T \mathbb{E}[\mathbf{t} \mathbf{t}^T] \mathbf{h} \leq \omega^2 \mathbf{d}^T \mathbb{E}[\mathbf{t} \mathbf{t}^T] \mathbf{d} = \omega^2 \text{trace}(\mathbf{d} \mathbf{d}^T \mathbb{E}[\mathbf{t} \mathbf{t}^T]) \tag{13}$$

19 Similarly, since all elements of matrix  $\mathbf{C}$ , namely,  $\mathbf{C}_{ij}$  is also non-negative, we have

$$\begin{aligned}\mathbb{E}[(t^T \mathbf{C} t)^2] &= \text{trace}(\mathbb{E}[\mathbf{C} t t^T \mathbf{C} t t^T]) \\ &\leq \text{trace}(\mathbb{E}[\mathbf{C} \mathbf{1} \mathbf{1}^T \mathbf{C} t t^T]) \\ &= \text{trace}(\mathbf{C} \mathbf{1} \mathbf{1}^T \mathbf{C} \mathbb{E}[t t^T])\end{aligned}\tag{14}$$

20 In summary, we have

$$\begin{aligned}\text{Var}[\hat{\tau}] &\leq \mathbb{E}[\hat{\tau}^2] \\ &\leq \frac{8}{n^2} (\mathbf{h}^T \mathbb{E}[t t^T] \mathbf{h} + 4\gamma^2 \mathbb{E}[(t^T \mathbf{C} t)^2]) \\ &\leq \frac{8\gamma^2}{n^2} \left( \omega^2 \text{trace}(\mathbf{d} \mathbf{d}^T \mathbb{E}[t t^T]) + 4 \text{trace}(\mathbf{C} \mathbf{1} \mathbf{1}^T \mathbf{C} \mathbb{E}[t t^T]) \right)\end{aligned}\tag{15}$$

21 By definition, we have

$$\mathbf{C} \mathbf{1} = \mathbf{d}\tag{16}$$

22 Thus the upper bound above is actually

$$\text{Var}[\hat{\tau}] \leq \frac{8\gamma^2(\omega^2 + 4)}{n^2} \left( \text{trace}(\mathbf{d} \mathbf{d}^T \mathbb{E}[t t^T]) \right)\tag{17}$$

23 At last, plug in following equation.

$$\mathbb{E}[t t^T] = \text{Cov}[t] + \frac{1}{4} \mathbf{1} \mathbf{1}^T\tag{18}$$

#### 24 **A.4 Proof of Lemma 1**

25 Here we provide an intuitive proof. Utilizing Box-Muller transformation or pure algebraic analysis  
26 are also feasible.

27 We consider  $X$  and  $Y$  is generated from multivariate Gaussian distribution,

$$X = \langle x, g \rangle \quad Y = \langle y, g \rangle\tag{19}$$

28 where  $g \sim \mathcal{N}(0, I_n)$  and  $x, y$  are two  $n$ -dim real vectors. Then we know that

$$\text{Cov}[X, Y] = \langle x, y \rangle\tag{20}$$

29 Moreover, we have

$$\mathbb{E}[\text{sgn}(X)] = 0 \quad \mathbb{E}[\text{sgn}(Y)] = 0\tag{21}$$

30 thus

$$\text{Cov}[\text{sgn}(X), \text{sgn}(Y)] = \mathbb{E}[\text{sgn}(X) \text{sgn}(Y)]\tag{22}$$

31 Then we think geometrically that  $\text{sgn}(\langle x, g \rangle) \text{sgn}(\langle y, g \rangle) > 0$  holds iff.  $g$  lies above or below both of  
32 the hyperplanes that is orthogonal to  $x$  and  $y$  respectively.  
33

34 Notice that the direction of  $g$  is uniform, it follows that

$$\mathbb{P}(\text{sgn}(\langle x, g \rangle) \text{sgn}(\langle y, g \rangle) > 0) = \frac{2}{2\pi} (\pi - \arccos(\langle x, y \rangle))\tag{23}$$

35 Now we put things together

$$\begin{aligned}\mathbb{E}[\text{sgn}(X) \text{sgn}(Y)] &= \mathbb{P}(\text{sgn}(X) \text{sgn}(Y) > 0) - \mathbb{P}(\text{sgn}(X) \text{sgn}(Y) < 0) \\ &= 2\mathbb{P}(\text{sgn}(X) \text{sgn}(Y) > 0) - 1 \\ &= 2\left(\frac{1}{\pi} (\pi - \arccos(\langle x, y \rangle))\right) - 1 \\ &= 1 - \frac{2}{\pi} \arccos(\langle x, y \rangle) \\ &= \frac{2}{\pi} \arcsin(\langle x, y \rangle)\end{aligned}\tag{24}$$

36 which gives the desired outcome.

## 37 B Simulation Details

### 38 B.1 Methods

39 We consider following linear potential outcome model,

$$Y_i(\mathbf{z}) = \alpha + \beta \cdot z_i + c \cdot \frac{d_i}{\bar{d}} + \sigma \cdot \epsilon_i + \gamma \frac{\sum_{j \in N_i} z_j}{d_i} \quad (25)$$

40 and multiplicative model, which is a simplified version of that in [6], with removing a covariate.

$$Y_i(\mathbf{z}) = (\alpha + \sigma \cdot \epsilon_i) \cdot \frac{d_i}{\bar{d}} \cdot (1 + \beta z_i + \gamma \frac{\sum_{j \in N_i} z_j}{d_i}) \quad (26)$$

41 We choose to fix all parameters except for interference density,  $\gamma$ . Namely, we set  $(\alpha, \beta, c, \sigma) =$   
 42  $(1, 1, 0.5, 0.1)$  for both models, and set  $\gamma \in \{0.5, 1, 2\}$  to construct three regimes.  $\epsilon_i \sim \mathcal{N}(0, 1)$ .

43 We set the clusters as given by Louvain algorithm with fixed random seed and resolution parameter  
 44 as 2, 5, 10.

45 We consider social network FB-Stanford3[5],<sup>1</sup> and FB-Cornell5[5].<sup>2</sup> These two social networks  
 46 provide the network topology, and we generate potential outcome for each unit with mentioned  
 47 potential outcome models.

48 Besides our optimized covariance design (OCD), we implement following randomization schemes.  
 49 We first consider two baselines, independent Bernoulli randomization (Ber) and complete randomiza-  
 50 tion (CR), both of which are cluster-level. We also implement two adaptive schemes, rerandomized-  
 51 adaptive randomization (ReAR) and pairwise-sequential randomization (PSR) [3, 4], which balance  
 52 heuristic covariates adaptively and act as competitive baselines, since the average degree is considered  
 53 as a covariate in these two methods and exactly appear in both two of our models, explicitly. Then we  
 54 implement the independent block randomization (IBR) [1] and heuristic version IBR-p that creates  
 55 blocks with size 2.

56 In the methods mentioned above, ReAR is the only one concerned with hyperparameters setting. We  
 57 set  $(q, B, \alpha) = (0.85, 400, 0.1)$ , which corresponds to the recommendation in the original paper.

58 We estimate GATE with standard HT estimator and difference-in-means (DIM) estimator, where the  
 59 latter refers to

$$\hat{\tau}_{DIM} = \sum_{i \in [n]} \left( \left( \frac{z_i}{\sum_{j \in [n]} z_j} - \frac{(1 - z_i)}{\sum_{j \in [n]} (1 - z_j)} \right) Y_i(z) \right) \quad (27)$$

60 To summarize, we provide the bias, standard deviation and MSE of two estimators under two potential  
 61 outcome models, three  $\gamma$  levels and two datasets. All of these three metrics are calculated by repetition  
 62 of Monte Carlo simulation of randomization, 200 times. In the main paper we've presented the results  
 63 of HT estimator on FB-Stanford3, and we'll present the detailed results in this section.

### 64 B.2 Discussion on Estimators

65 Here we also provide discussion on another popular estimator that's considered in existing literature,  
 66 which is the HT estimator with exposure indicator. We consider the exposure condition that's fully  
 67 treated or fully controlled in 1-hop neighborhood here, and the corresponding indicator is defined as  
 68  $\delta_i(z_0) = \mathbb{I}\{\sum_{j \in N_i} z_j = d_i z_0\}$ . The estimator is

$$\hat{\tau}' = \frac{1}{n} \sum_{i \in [n]} \left( \left( \frac{\delta_i(1)}{\mathbb{E}[\delta_i(1)]} - \frac{\delta_i(0)}{\mathbb{E}[\delta_i(0)]} \right) Y_i(\mathbf{z}) \right) \quad (28)$$

69 We don't consider this estimator not only because of it's high variance resulted from low effective  
 70 sample size, and but also its high calculation cost. For calculating it in our repeated simulations, we

<sup>1</sup>Network topology data can be found in <https://networkrepository.com/socfb-Stanford3.php>

<sup>2</sup><https://networkrepository.com/socfb-Cornell15.php>

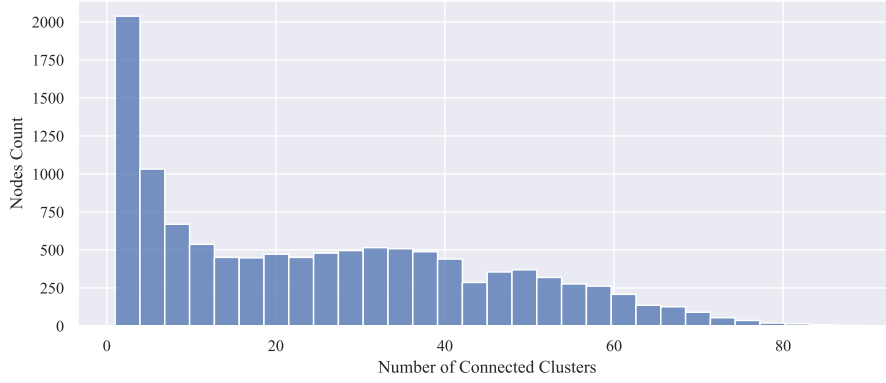

Figure 1: Distribution of  $c_i$  with 95 clusters on FB-Stanford3

need to estimate  $\mathbb{E}[\delta_i(1)]$ , the probability of fully treated, for each unit  $i$ . We denote the number of clusters a unit  $i$  connects to by  $c_i$ . For a unit  $i$  in the exterior of its cluster, namely,  $c_i > 1$ , such a quantity can be very high in a social network, which is also decided by the resolution of clustering, we present an instance in figure 1.

Unfortunately, we must estimate such generalized propensity score [2] by Monte Carlo simulation for most of randomization schemes, even if it's just a little bit more complex than independent Bernoulli randomization, where such quantity can be calculated directly,  $(1/2)^{c_i}$ . For every simulation, we should visit every node and query the treatment assignment of its 1-hop neighborhood, whose time complexity is  $O(|E|)$ . Roughly, we need  $2^{c_i}$  repetitions of randomization to achieve effective estimation on  $\delta_i(1), \delta_i(0)$ , which is too time-consuming to be acceptable for many units.

We stress the computational issue here since the resulted variance can be reduced by self-normalization, which corresponds to the Hájek estimator.

$$\hat{\tau}' = \sum_{i \in [n]} \left( \left( \frac{\frac{\delta_i(1)}{\mathbb{E}[\delta_i(1)]}}{\sum_{j \in [n]} \frac{\delta_j(1)}{\mathbb{E}[\delta_j(1)]}} \right) - \left( \frac{\frac{\delta_i(0)}{\mathbb{E}[\delta_i(0)]}}{\sum_{j \in [n]} \frac{\delta_j(0)}{\mathbb{E}[\delta_j(0)]}} \right) \right) Y_i(z) \quad (29)$$

However, we argue that the computational cost can't be bypassed without further modification and restricts the practicality of such HT estimator with exposure indicator. [3] proposes the so-called cluster-adjusted estimator that assign the units on the exterior of same cluster the same modified propensity score, which reduces the computation complexity at the cost of unpredictable distortion of estimator, which can be viewed as heuristics.

Therefore, we choose to consider the standard HT estimator and DIM estimator in our simulation.

### B.3 Detailed Simulation Results

We present the results according to following sequence: HT-DIM estimator, linear-multiplicative model, 2-5-10 clustering resolution. In every table, we report the average bias, standard deviation (SD) and MSE of randomization schemes with three  $\gamma$  levels.

Table 1: Simulation results of **HT** estimator under **linear** model with resolution **2** on FB-Stanford3

| gamma<br>metric<br>method | 0.5    |       |       | 1.0    |       |       | 2.0    |       |       |
|---------------------------|--------|-------|-------|--------|-------|-------|--------|-------|-------|
|                           | Bias   | SD    | MSE   | Bias   | SD    | MSE   | Bias   | SD    | MSE   |
| <b>Ber</b>                | -0.232 | 0.121 | 0.069 | -0.506 | 0.126 | 0.272 | -0.999 | 0.131 | 1.016 |
| <b>CR</b>                 | -0.242 | 0.118 | 0.073 | -0.481 | 0.120 | 0.247 | -0.998 | 0.127 | 1.013 |
| <b>ReAR</b>               | -0.259 | 0.062 | 0.071 | -0.491 | 0.059 | 0.245 | -0.971 | 0.062 | 0.949 |
| <b>PSR</b>                | -0.240 | 0.058 | 0.061 | -0.483 | 0.060 | 0.237 | -0.973 | 0.058 | 0.951 |
| <b>IBR</b>                | -0.253 | 0.112 | 0.077 | -0.496 | 0.103 | 0.257 | -0.987 | 0.114 | 0.988 |
| <b>IBR-p</b>              | -0.248 | 0.086 | 0.069 | -0.490 | 0.096 | 0.250 | -0.986 | 0.093 | 0.981 |
| <b>OCD</b>                | -0.212 | 0.053 | 0.048 | -0.423 | 0.056 | 0.182 | -0.838 | 0.061 | 0.706 |

Table 2: Simulation results of **DIM** estimator under **linear** model with resolution **2** on FB-Stanford3

| gamma<br>metric<br>method | 0.5    |       |       | 1.0    |       |       | 2.0    |       |       |
|---------------------------|--------|-------|-------|--------|-------|-------|--------|-------|-------|
|                           | Bias   | SD    | MSE   | Bias   | SD    | MSE   | Bias   | SD    | MSE   |
| <b>Ber</b>                | -0.352 | 1.038 | 1.202 | -0.451 | 1.089 | 1.388 | -0.793 | 1.462 | 2.765 |
| <b>CR</b>                 | -0.235 | 0.643 | 0.469 | -0.444 | 0.722 | 0.719 | -1.057 | 0.839 | 1.822 |
| <b>ReAR</b>               | -0.247 | 0.159 | 0.086 | -0.544 | 0.147 | 0.318 | -0.951 | 0.185 | 0.940 |
| <b>PSR</b>                | -0.244 | 0.236 | 0.115 | -0.458 | 0.246 | 0.271 | -0.972 | 0.286 | 1.028 |
| <b>IBR</b>                | -0.233 | 0.230 | 0.108 | -0.460 | 0.246 | 0.273 | -0.972 | 0.296 | 1.033 |
| <b>IBR-p</b>              | -0.239 | 0.158 | 0.082 | -0.484 | 0.166 | 0.262 | -0.971 | 0.193 | 0.980 |
| <b>OCD</b>                | -0.198 | 0.227 | 0.091 | -0.440 | 0.280 | 0.272 | -0.848 | 0.327 | 0.827 |

Table 3: Simulation results of **HT** estimator under **multiplicative** model with resolution **2** on FB-Stanford3

| gamma<br>metric<br>method | 0.5    |       |       | 1.0    |       |       | 2.0    |       |       |
|---------------------------|--------|-------|-------|--------|-------|-------|--------|-------|-------|
|                           | Bias   | SD    | MSE   | Bias   | SD    | MSE   | Bias   | SD    | MSE   |
| <b>Ber</b>                | -0.328 | 0.398 | 0.267 | -0.620 | 0.481 | 0.617 | -1.281 | 0.657 | 2.075 |
| <b>CR</b>                 | -0.247 | 0.440 | 0.254 | -0.585 | 0.495 | 0.588 | -1.163 | 0.617 | 1.734 |
| <b>ReAR</b>               | -0.290 | 0.209 | 0.128 | -0.542 | 0.219 | 0.343 | -1.308 | 0.312 | 1.810 |
| <b>PSR</b>                | -0.318 | 0.207 | 0.144 | -0.617 | 0.241 | 0.440 | -1.208 | 0.309 | 1.556 |
| <b>IBR</b>                | -0.311 | 0.362 | 0.228 | -0.640 | 0.401 | 0.570 | -1.230 | 0.548 | 1.816 |
| <b>IBR-p</b>              | -0.324 | 0.303 | 0.197 | -0.613 | 0.355 | 0.503 | -1.175 | 0.436 | 1.572 |
| <b>OCD</b>                | -0.270 | 0.178 | 0.105 | -0.549 | 0.210 | 0.346 | -1.060 | 0.270 | 1.198 |

Table 4: Simulation results of **DIM** estimator under **multiplicative** model with resolution **2** on FB-Stanford3

| gamma<br>metric<br>method | 0.5    |       |       | 1.0    |       |       | 2.0    |       |       |
|---------------------------|--------|-------|-------|--------|-------|-------|--------|-------|-------|
|                           | Bias   | SD    | MSE   | Bias   | SD    | MSE   | Bias   | SD    | MSE   |
| <b>Ber</b>                | -0.262 | 0.799 | 0.707 | -0.585 | 0.893 | 1.141 | -1.169 | 1.233 | 2.887 |
| <b>CR</b>                 | -0.293 | 0.493 | 0.329 | -0.592 | 0.607 | 0.719 | -1.117 | 0.699 | 1.737 |
| <b>ReAR</b>               | -0.276 | 0.232 | 0.130 | -0.519 | 0.307 | 0.363 | -1.308 | 0.403 | 1.874 |
| <b>PSR</b>                | -0.312 | 0.309 | 0.193 | -0.612 | 0.364 | 0.508 | -1.199 | 0.477 | 1.666 |
| <b>IBR</b>                | -0.315 | 0.348 | 0.221 | -0.638 | 0.370 | 0.544 | -1.240 | 0.501 | 1.789 |
| <b>IBR-p</b>              | -0.330 | 0.287 | 0.192 | -0.595 | 0.336 | 0.468 | -1.207 | 0.412 | 1.629 |
| <b>OCD</b>                | -0.293 | 0.166 | 0.114 | -0.533 | 0.178 | 0.316 | -1.086 | 0.236 | 1.236 |

Table 5: Simulation results of **HT** estimator under **linear** model with resolution **5** on FB-Stanford3

| gamma<br>metric<br>method | 0.5    |       |       | 1.0    |       |       | 2.0    |       |       |
|---------------------------|--------|-------|-------|--------|-------|-------|--------|-------|-------|
|                           | Bias   | SD    | MSE   | Bias   | SD    | MSE   | Bias   | SD    | MSE   |
| <b>Ber</b>                | -0.278 | 0.092 | 0.086 | -0.569 | 0.089 | 0.332 | -1.111 | 0.097 | 1.244 |
| <b>CR</b>                 | -0.274 | 0.089 | 0.083 | -0.559 | 0.093 | 0.321 | -1.124 | 0.100 | 1.274 |
| <b>ReAR</b>               | -0.307 | 0.031 | 0.095 | -0.581 | 0.045 | 0.340 | -1.136 | 0.057 | 1.294 |
| <b>PSR</b>                | -0.275 | 0.049 | 0.078 | -0.554 | 0.053 | 0.310 | -1.113 | 0.058 | 1.243 |
| <b>IBR</b>                | -0.274 | 0.087 | 0.083 | -0.550 | 0.090 | 0.311 | -1.111 | 0.090 | 1.243 |
| <b>IBR-p</b>              | -0.200 | 0.073 | 0.045 | -0.492 | 0.073 | 0.248 | -1.053 | 0.075 | 1.115 |
| <b>OCD</b>                | -0.199 | 0.108 | 0.051 | -0.409 | 0.106 | 0.179 | -0.788 | 0.106 | 0.632 |

Table 6: Simulation results of **DIM** estimator under **linear** model with resolution **5** on FB-Stanford3

| gamma<br>metric<br>method | 0.5    |       |       | 1.0    |       |       | 2.0    |       |       |
|---------------------------|--------|-------|-------|--------|-------|-------|--------|-------|-------|
|                           | Bias   | SD    | MSE   | Bias   | SD    | MSE   | Bias   | SD    | MSE   |
| <b>Ber</b>                | -0.254 | 0.672 | 0.516 | -0.420 | 0.694 | 0.659 | -1.037 | 0.796 | 1.710 |
| <b>CR</b>                 | -0.308 | 0.453 | 0.300 | -0.643 | 0.543 | 0.709 | -1.161 | 0.674 | 1.802 |
| <b>ReAR</b>               | -0.045 | 0.093 | 0.011 | -0.361 | 0.182 | 0.164 | -0.904 | 0.248 | 0.880 |
| <b>PSR</b>                | -0.262 | 0.226 | 0.120 | -0.554 | 0.252 | 0.371 | -1.122 | 0.306 | 1.354 |
| <b>IBR</b>                | -0.302 | 0.269 | 0.164 | -0.531 | 0.312 | 0.380 | -1.094 | 0.380 | 1.341 |
| <b>IBR-p</b>              | -0.696 | 0.063 | 0.489 | -1.028 | 0.075 | 1.064 | -1.685 | 0.096 | 2.852 |
| <b>OCD</b>                | -0.214 | 0.371 | 0.183 | -0.376 | 0.411 | 0.311 | -0.857 | 0.510 | 0.996 |

Table 7: Simulation results of **HT** estimator under **multiplicative** model with resolution **5** on FB-Stanford3

| gamma<br>metric<br>method | 0.5    |       |       | 1.0    |       |       | 2.0    |       |       |
|---------------------------|--------|-------|-------|--------|-------|-------|--------|-------|-------|
|                           | Bias   | SD    | MSE   | Bias   | SD    | MSE   | Bias   | SD    | MSE   |
| <b>Ber</b>                | -0.366 | 0.333 | 0.245 | -0.684 | 0.391 | 0.621 | -1.321 | 0.486 | 1.984 |
| <b>CR</b>                 | -0.329 | 0.348 | 0.230 | -0.717 | 0.390 | 0.667 | -1.378 | 0.483 | 2.134 |
| <b>ReAR</b>               | -0.440 | 0.130 | 0.211 | -0.822 | 0.177 | 0.707 | -1.614 | 0.181 | 2.639 |
| <b>PSR</b>                | -0.344 | 0.186 | 0.153 | -0.667 | 0.219 | 0.493 | -1.346 | 0.273 | 1.887 |
| <b>IBR</b>                | -0.322 | 0.300 | 0.194 | -0.693 | 0.332 | 0.590 | -1.396 | 0.464 | 2.165 |
| <b>IBR-p</b>              | -0.080 | 0.265 | 0.077 | -0.407 | 0.315 | 0.265 | -1.017 | 0.423 | 1.214 |
| <b>OCD</b>                | -0.258 | 0.354 | 0.193 | -0.506 | 0.418 | 0.432 | -1.059 | 0.505 | 1.378 |

Table 8: Simulation results of **DIM** estimator under **multiplicative** model with resolution **5** on FB-Stanford3

| gamma<br>metric<br>method | 0.5    |       |       | 1.0    |       |       | 2.0    |       |       |
|---------------------------|--------|-------|-------|--------|-------|-------|--------|-------|-------|
|                           | Bias   | SD    | MSE   | Bias   | SD    | MSE   | Bias   | SD    | MSE   |
| <b>Ber</b>                | -0.357 | 0.462 | 0.342 | -0.683 | 0.514 | 0.732 | -1.349 | 0.637 | 2.227 |
| <b>CR</b>                 | -0.383 | 0.288 | 0.230 | -0.706 | 0.319 | 0.601 | -1.429 | 0.429 | 2.228 |
| <b>ReAR</b>               | -0.261 | 0.120 | 0.083 | -0.655 | 0.135 | 0.447 | -1.377 | 0.175 | 1.927 |
| <b>PSR</b>                | -0.339 | 0.132 | 0.133 | -0.674 | 0.145 | 0.476 | -1.369 | 0.172 | 1.906 |
| <b>IBR</b>                | -0.335 | 0.172 | 0.142 | -0.713 | 0.190 | 0.545 | -1.401 | 0.259 | 2.031 |
| <b>IBR-p</b>              | -0.473 | 0.184 | 0.258 | -0.847 | 0.219 | 0.766 | -1.571 | 0.294 | 2.556 |
| <b>OCD</b>                | -0.255 | 0.052 | 0.068 | -0.519 | 0.076 | 0.276 | -1.043 | 0.101 | 1.100 |

Table 9: Simulation results of **HT** estimator under **linear** model with resolution **10** on FB-Stanford3

| gamma<br>metric<br>method | 0.5    |       |       | 1.0    |       |       | 2.0    |       |       |
|---------------------------|--------|-------|-------|--------|-------|-------|--------|-------|-------|
|                           | Bias   | SD    | MSE   | Bias   | SD    | MSE   | Bias   | SD    | MSE   |
| <b>Ber</b>                | -0.300 | 0.078 | 0.096 | -0.585 | 0.076 | 0.348 | -1.190 | 0.078 | 1.424 |
| <b>CR</b>                 | -0.300 | 0.077 | 0.096 | -0.596 | 0.077 | 0.362 | -1.192 | 0.081 | 1.429 |
| <b>ReAR</b>               | -0.296 | 0.022 | 0.088 | -0.592 | 0.025 | 0.351 | -1.201 | 0.022 | 1.444 |
| <b>PSR</b>                | -0.293 | 0.036 | 0.087 | -0.595 | 0.038 | 0.356 | -1.192 | 0.038 | 1.422 |
| <b>IBR</b>                | -0.294 | 0.059 | 0.090 | -0.593 | 0.052 | 0.354 | -1.191 | 0.058 | 1.424 |
| <b>IBR-p</b>              | -0.295 | 0.047 | 0.090 | -0.590 | 0.051 | 0.351 | -1.191 | 0.052 | 1.423 |
| <b>OCD</b>                | -0.189 | 0.099 | 0.046 | -0.396 | 0.102 | 0.168 | -0.796 | 0.107 | 0.646 |

Table 10: Simulation results of **DIM** estimator under **linear** model with resolution **10** on FB-Stanford3

| gamma<br>metric<br>method | 0.5    |       |       | 1.0    |       |       | 2.0    |       |       |
|---------------------------|--------|-------|-------|--------|-------|-------|--------|-------|-------|
|                           | Bias   | SD    | MSE   | Bias   | SD    | MSE   | Bias   | SD    | MSE   |
| <b>Ber</b>                | -0.330 | 0.527 | 0.387 | -0.567 | 0.586 | 0.665 | -1.200 | 0.714 | 1.950 |
| <b>CR</b>                 | -0.265 | 0.423 | 0.250 | -0.548 | 0.450 | 0.504 | -1.157 | 0.551 | 1.643 |
| <b>ReAR</b>               | -0.364 | 0.235 | 0.188 | -0.688 | 0.262 | 0.543 | -1.281 | 0.318 | 1.744 |
| <b>PSR</b>                | -0.321 | 0.234 | 0.158 | -0.605 | 0.263 | 0.436 | -1.191 | 0.325 | 1.526 |
| <b>IBR</b>                | -0.299 | 0.266 | 0.160 | -0.571 | 0.306 | 0.420 | -1.171 | 0.370 | 1.510 |
| <b>IBR-p</b>              | -0.305 | 0.232 | 0.147 | -0.594 | 0.264 | 0.423 | -1.156 | 0.316 | 1.437 |
| <b>OCD</b>                | -0.240 | 0.354 | 0.183 | -0.395 | 0.417 | 0.330 | -0.771 | 0.539 | 0.885 |

Table 11: Simulation results of **HT** estimator under **multiplicative** model with resolution **10** on FB-Stanford3

| gamma<br>metric<br>method | 0.5    |       |       | 1.0    |       |       | 2.0    |       |       |
|---------------------------|--------|-------|-------|--------|-------|-------|--------|-------|-------|
|                           | Bias   | SD    | MSE   | Bias   | SD    | MSE   | Bias   | SD    | MSE   |
| <b>Ber</b>                | -0.348 | 0.258 | 0.188 | -0.766 | 0.307 | 0.682 | -1.446 | 0.390 | 2.244 |
| <b>CR</b>                 | -0.375 | 0.264 | 0.211 | -0.729 | 0.322 | 0.636 | -1.504 | 0.369 | 2.400 |
| <b>ReAR</b>               | -0.353 | 0.074 | 0.130 | -0.725 | 0.094 | 0.536 | -1.426 | 0.117 | 2.050 |
| <b>PSR</b>                | -0.384 | 0.120 | 0.162 | -0.755 | 0.129 | 0.588 | -1.489 | 0.179 | 2.249 |
| <b>IBR</b>                | -0.402 | 0.172 | 0.192 | -0.742 | 0.227 | 0.603 | -1.466 | 0.274 | 2.226 |
| <b>IBR-p</b>              | -0.360 | 0.154 | 0.154 | -0.739 | 0.186 | 0.581 | -1.468 | 0.238 | 2.212 |
| <b>OCD</b>                | -0.253 | 0.355 | 0.190 | -0.546 | 0.396 | 0.455 | -1.060 | 0.499 | 1.374 |

Table 12: Simulation results of **DIM** estimator under **multiplicative** model with resolution **10** on FB-Stanford3

| gamma<br>metric<br>method | 0.5    |       |       | 1.0    |       |       | 2.0    |       |       |
|---------------------------|--------|-------|-------|--------|-------|-------|--------|-------|-------|
|                           | Bias   | SD    | MSE   | Bias   | SD    | MSE   | Bias   | SD    | MSE   |
| <b>Ber</b>                | -0.407 | 0.326 | 0.272 | -0.750 | 0.383 | 0.710 | -1.463 | 0.480 | 2.373 |
| <b>CR</b>                 | -0.336 | 0.232 | 0.167 | -0.719 | 0.269 | 0.590 | -1.474 | 0.348 | 2.297 |
| <b>ReAR</b>               | -0.416 | 0.152 | 0.197 | -0.763 | 0.174 | 0.613 | -1.546 | 0.234 | 2.446 |
| <b>PSR</b>                | -0.356 | 0.137 | 0.146 | -0.747 | 0.162 | 0.585 | -1.446 | 0.188 | 2.129 |
| <b>IBR</b>                | -0.361 | 0.160 | 0.157 | -0.726 | 0.174 | 0.558 | -1.497 | 0.228 | 2.295 |
| <b>IBR-p</b>              | -0.375 | 0.166 | 0.169 | -0.750 | 0.189 | 0.600 | -1.480 | 0.238 | 2.248 |
| <b>OCD</b>                | -0.264 | 0.059 | 0.074 | -0.527 | 0.060 | 0.282 | -1.051 | 0.083 | 1.113 |



Table 13: Simulation results of **HT** estimator under **linear** model with resolution **2** on FB-Cornell5

| gamma<br>metric<br>method | 0.5    |       |       | 1.0    |       |       | 2.0    |       |       |
|---------------------------|--------|-------|-------|--------|-------|-------|--------|-------|-------|
|                           | Bias   | SD    | MSE   | Bias   | SD    | MSE   | Bias   | SD    | MSE   |
| <b>Ber</b>                | -0.251 | 0.129 | 0.080 | -0.506 | 0.122 | 0.271 | -0.996 | 0.124 | 1.008 |
| <b>CR</b>                 | -0.244 | 0.111 | 0.072 | -0.502 | 0.114 | 0.265 | -0.992 | 0.129 | 1.002 |
| <b>ReAR</b>               | -0.233 | 0.057 | 0.058 | -0.484 | 0.065 | 0.239 | -0.981 | 0.065 | 0.968 |
| <b>PSR</b>                | -0.242 | 0.058 | 0.062 | -0.483 | 0.059 | 0.237 | -0.977 | 0.061 | 0.960 |
| <b>IBR</b>                | -0.251 | 0.103 | 0.074 | -0.493 | 0.104 | 0.255 | -1.001 | 0.117 | 1.016 |
| <b>IBR-p</b>              | -0.235 | 0.087 | 0.063 | -0.488 | 0.090 | 0.246 | -0.986 | 0.095 | 0.982 |
| <b>OCD</b>                | -0.184 | 0.085 | 0.041 | -0.371 | 0.083 | 0.145 | -0.769 | 0.087 | 0.600 |

Table 14: Simulation results of **DIM** estimator under **linear** model with resolution **2** on FB-Cornell5

| gamma<br>metric<br>method | 0.5    |       |       | 1.0    |       |       | 2.0    |       |       |
|---------------------------|--------|-------|-------|--------|-------|-------|--------|-------|-------|
|                           | Bias   | SD    | MSE   | Bias   | SD    | MSE   | Bias   | SD    | MSE   |
| <b>Ber</b>                | -0.166 | 1.048 | 1.126 | -0.214 | 1.101 | 1.258 | -1.003 | 1.335 | 2.790 |
| <b>CR</b>                 | -0.228 | 0.611 | 0.425 | -0.465 | 0.679 | 0.678 | -0.938 | 0.838 | 1.582 |
| <b>ReAR</b>               | -0.255 | 0.172 | 0.095 | -0.462 | 0.159 | 0.239 | -0.975 | 0.190 | 0.987 |
| <b>PSR</b>                | -0.239 | 0.234 | 0.112 | -0.492 | 0.261 | 0.311 | -1.006 | 0.298 | 1.102 |
| <b>IBR</b>                | -0.236 | 0.227 | 0.107 | -0.501 | 0.253 | 0.315 | -0.983 | 0.291 | 1.051 |
| <b>IBR-p</b>              | -0.242 | 0.149 | 0.081 | -0.504 | 0.164 | 0.282 | -0.985 | 0.209 | 1.015 |
| <b>OCD</b>                | -0.205 | 0.318 | 0.143 | -0.422 | 0.348 | 0.300 | -0.723 | 0.476 | 0.750 |

Table 15: Simulation results of **HT** estimator under **multiplicative** model with resolution **2** on FB-Cornell5

| gamma<br>metric<br>method | 0.5    |       |       | 1.0    |       |       | 2.0    |       |       |
|---------------------------|--------|-------|-------|--------|-------|-------|--------|-------|-------|
|                           | Bias   | SD    | MSE   | Bias   | SD    | MSE   | Bias   | SD    | MSE   |
| <b>Ber</b>                | -0.360 | 0.451 | 0.333 | -0.616 | 0.513 | 0.643 | -1.241 | 0.591 | 1.890 |
| <b>CR</b>                 | -0.303 | 0.418 | 0.267 | -0.653 | 0.453 | 0.633 | -1.274 | 0.575 | 1.955 |
| <b>ReAR</b>               | -0.317 | 0.201 | 0.141 | -0.685 | 0.237 | 0.526 | -1.231 | 0.308 | 1.612 |
| <b>PSR</b>                | -0.323 | 0.199 | 0.144 | -0.608 | 0.235 | 0.426 | -1.217 | 0.291 | 1.568 |
| <b>IBR</b>                | -0.292 | 0.368 | 0.221 | -0.589 | 0.410 | 0.516 | -1.211 | 0.509 | 1.728 |
| <b>IBR-p</b>              | -0.315 | 0.318 | 0.201 | -0.606 | 0.385 | 0.516 | -1.190 | 0.454 | 1.623 |
| <b>OCD</b>                | -0.266 | 0.285 | 0.152 | -0.529 | 0.327 | 0.388 | -0.984 | 0.410 | 1.137 |

Table 16: Simulation results of **DIM** estimator under **multiplicative** model with resolution **2** on FB-Cornell5

| gamma<br>metric<br>method | 0.5    |       |       | 1.0    |       |       | 2.0    |       |       |
|---------------------------|--------|-------|-------|--------|-------|-------|--------|-------|-------|
|                           | Bias   | SD    | MSE   | Bias   | SD    | MSE   | Bias   | SD    | MSE   |
| <b>Ber</b>                | -0.381 | 0.792 | 0.773 | -0.602 | 0.919 | 1.208 | -1.171 | 1.130 | 2.651 |
| <b>CR</b>                 | -0.344 | 0.462 | 0.332 | -0.634 | 0.578 | 0.737 | -1.206 | 0.722 | 1.977 |
| <b>ReAR</b>               | -0.334 | 0.221 | 0.161 | -0.692 | 0.294 | 0.566 | -1.235 | 0.329 | 1.634 |
| <b>PSR</b>                | -0.311 | 0.325 | 0.203 | -0.614 | 0.353 | 0.502 | -1.201 | 0.465 | 1.659 |
| <b>IBR</b>                | -0.279 | 0.336 | 0.191 | -0.608 | 0.367 | 0.505 | -1.225 | 0.471 | 1.723 |
| <b>IBR-p</b>              | -0.328 | 0.288 | 0.191 | -0.612 | 0.357 | 0.502 | -1.184 | 0.410 | 1.570 |
| <b>OCD</b>                | -0.250 | 0.070 | 0.068 | -0.496 | 0.037 | 0.248 | -0.998 | 0.068 | 1.002 |

Table 17: Simulation results of **HT** estimator under **linear** model with resolution **5** on FB-Cornell5

| gamma<br>metric<br>method | 0.5    |       |       | 1.0    |       |       | 2.0    |       |       |
|---------------------------|--------|-------|-------|--------|-------|-------|--------|-------|-------|
|                           | Bias   | SD    | MSE   | Bias   | SD    | MSE   | Bias   | SD    | MSE   |
| <b>Ber</b>                | -0.263 | 0.098 | 0.079 | -0.567 | 0.095 | 0.331 | -1.121 | 0.105 | 1.270 |
| <b>CR</b>                 | -0.268 | 0.092 | 0.080 | -0.553 | 0.093 | 0.315 | -1.111 | 0.090 | 1.244 |
| <b>ReAR</b>               | -0.307 | 0.036 | 0.096 | -0.593 | 0.049 | 0.354 | -1.138 | 0.038 | 1.298 |
| <b>PSR</b>                | -0.279 | 0.056 | 0.082 | -0.551 | 0.055 | 0.307 | -1.110 | 0.056 | 1.237 |
| <b>IBR</b>                | -0.273 | 0.088 | 0.083 | -0.544 | 0.080 | 0.303 | -1.113 | 0.091 | 1.248 |
| <b>IBR-p</b>              | -0.210 | 0.073 | 0.050 | -0.493 | 0.074 | 0.249 | -1.048 | 0.079 | 1.105 |
| <b>OCD</b>                | -0.203 | 0.103 | 0.052 | -0.401 | 0.109 | 0.173 | -0.792 | 0.103 | 0.639 |

Table 18: Simulation results of **DIM** estimator under **linear** model with resolution **5** on FB-Cornell5

| gamma<br>metric<br>method | 0.5    |       |       | 1.0    |       |       | 2.0    |       |       |
|---------------------------|--------|-------|-------|--------|-------|-------|--------|-------|-------|
|                           | Bias   | SD    | MSE   | Bias   | SD    | MSE   | Bias   | SD    | MSE   |
| <b>Ber</b>                | -0.380 | 0.649 | 0.567 | -0.504 | 0.783 | 0.867 | -1.090 | 0.923 | 2.042 |
| <b>CR</b>                 | -0.375 | 0.502 | 0.393 | -0.656 | 0.533 | 0.716 | -1.159 | 0.663 | 1.784 |
| <b>ReAR</b>               | -0.075 | 0.127 | 0.022 | -0.373 | 0.175 | 0.171 | -0.855 | 0.216 | 0.779 |
| <b>PSR</b>                | -0.248 | 0.220 | 0.110 | -0.551 | 0.250 | 0.367 | -1.082 | 0.313 | 1.269 |
| <b>IBR</b>                | -0.277 | 0.284 | 0.158 | -0.572 | 0.319 | 0.429 | -1.094 | 0.365 | 1.331 |
| <b>IBR-p</b>              | -0.689 | 0.066 | 0.479 | -1.025 | 0.077 | 1.058 | -1.682 | 0.091 | 2.839 |
| <b>OCD</b>                | -0.178 | 0.368 | 0.168 | -0.384 | 0.425 | 0.328 | -0.820 | 0.525 | 0.949 |

Table 19: Simulation results of **HT** estimator under **multiplicative** model with resolution **5** on FB-Cornell5

| gamma<br>metric<br>method | 0.5    |       |       | 1.0    |       |       | 2.0    |       |       |
|---------------------------|--------|-------|-------|--------|-------|-------|--------|-------|-------|
|                           | Bias   | SD    | MSE   | Bias   | SD    | MSE   | Bias   | SD    | MSE   |
| <b>Ber</b>                | -0.317 | 0.333 | 0.212 | -0.691 | 0.357 | 0.605 | -1.432 | 0.461 | 2.263 |
| <b>CR</b>                 | -0.332 | 0.329 | 0.219 | -0.688 | 0.396 | 0.632 | -1.386 | 0.480 | 2.153 |
| <b>ReAR</b>               | -0.456 | 0.137 | 0.228 | -0.816 | 0.142 | 0.686 | -1.550 | 0.231 | 2.457 |
| <b>PSR</b>                | -0.344 | 0.193 | 0.156 | -0.669 | 0.222 | 0.497 | -1.361 | 0.287 | 1.937 |
| <b>IBR</b>                | -0.345 | 0.304 | 0.212 | -0.697 | 0.349 | 0.608 | -1.368 | 0.432 | 2.061 |
| <b>IBR-p</b>              | -0.115 | 0.287 | 0.096 | -0.425 | 0.300 | 0.271 | -1.038 | 0.421 | 1.256 |
| <b>OCD</b>                | -0.218 | 0.375 | 0.188 | -0.488 | 0.427 | 0.421 | -1.042 | 0.542 | 1.380 |

Table 20: Simulation results of **DIM** estimator under **multiplicative** model with resolution **5** on FB-Cornell5

| gamma<br>metric<br>method | 0.5    |       |       | 1.0    |       |       | 2.0    |       |       |
|---------------------------|--------|-------|-------|--------|-------|-------|--------|-------|-------|
|                           | Bias   | SD    | MSE   | Bias   | SD    | MSE   | Bias   | SD    | MSE   |
| <b>Ber</b>                | -0.305 | 0.464 | 0.308 | -0.670 | 0.504 | 0.704 | -1.337 | 0.622 | 2.175 |
| <b>CR</b>                 | -0.354 | 0.277 | 0.203 | -0.719 | 0.348 | 0.639 | -1.448 | 0.428 | 2.282 |
| <b>ReAR</b>               | -0.291 | 0.091 | 0.093 | -0.619 | 0.125 | 0.399 | -1.295 | 0.199 | 1.718 |
| <b>PSR</b>                | -0.320 | 0.127 | 0.118 | -0.672 | 0.141 | 0.472 | -1.360 | 0.180 | 1.883 |
| <b>IBR</b>                | -0.349 | 0.187 | 0.157 | -0.677 | 0.216 | 0.506 | -1.369 | 0.270 | 1.948 |
| <b>IBR-p</b>              | -0.500 | 0.206 | 0.293 | -0.863 | 0.208 | 0.790 | -1.590 | 0.294 | 2.617 |
| <b>OCD</b>                | -0.258 | 0.031 | 0.068 | -0.526 | 0.081 | 0.284 | -1.033 | 0.065 | 1.071 |

Table 21: Simulation results of **HT** estimator under **linear** model with resolution **10** on FB-Cornell5

| gamma<br>metric<br>method | 0.5    |       |       | 1.0    |       |       | 2.0    |       |       |
|---------------------------|--------|-------|-------|--------|-------|-------|--------|-------|-------|
|                           | Bias   | SD    | MSE   | Bias   | SD    | MSE   | Bias   | SD    | MSE   |
| <b>Ber</b>                | -0.301 | 0.080 | 0.098 | -0.600 | 0.072 | 0.365 | -1.175 | 0.078 | 1.387 |
| <b>CR</b>                 | -0.294 | 0.076 | 0.093 | -0.603 | 0.077 | 0.370 | -1.192 | 0.083 | 1.428 |
| <b>ReAR</b>               | -0.294 | 0.023 | 0.087 | -0.600 | 0.021 | 0.361 | -1.196 | 0.027 | 1.432 |
| <b>PSR</b>                | -0.299 | 0.034 | 0.091 | -0.597 | 0.036 | 0.358 | -1.195 | 0.036 | 1.431 |
| <b>IBR</b>                | -0.294 | 0.054 | 0.090 | -0.596 | 0.056 | 0.359 | -1.186 | 0.059 | 1.411 |
| <b>IBR-p</b>              | -0.302 | 0.046 | 0.094 | -0.598 | 0.044 | 0.360 | -1.186 | 0.056 | 1.410 |
| <b>OCD</b>                | -0.192 | 0.118 | 0.051 | -0.377 | 0.118 | 0.157 | -0.762 | 0.123 | 0.597 |

Table 22: Simulation results of **DIM** estimator under **linear** model with resolution **10** on FB-Cornell5

| gamma<br>metric<br>method | 0.5    |       |       | 1.0    |       |       | 2.0    |       |       |
|---------------------------|--------|-------|-------|--------|-------|-------|--------|-------|-------|
|                           | Bias   | SD    | MSE   | Bias   | SD    | MSE   | Bias   | SD    | MSE   |
| <b>Ber</b>                | -0.292 | 0.541 | 0.378 | -0.536 | 0.552 | 0.593 | -1.291 | 0.740 | 2.214 |
| <b>CR</b>                 | -0.286 | 0.399 | 0.242 | -0.547 | 0.450 | 0.503 | -1.194 | 0.580 | 1.764 |
| <b>ReAR</b>               | -0.328 | 0.243 | 0.167 | -0.626 | 0.265 | 0.463 | -1.288 | 0.310 | 1.757 |
| <b>PSR</b>                | -0.271 | 0.234 | 0.129 | -0.566 | 0.263 | 0.389 | -1.168 | 0.326 | 1.471 |
| <b>IBR</b>                | -0.302 | 0.278 | 0.169 | -0.582 | 0.309 | 0.435 | -1.169 | 0.377 | 1.509 |
| <b>IBR-p</b>              | -0.288 | 0.233 | 0.137 | -0.598 | 0.264 | 0.428 | -1.216 | 0.308 | 1.575 |
| <b>OCD</b>                | -0.193 | 0.407 | 0.203 | -0.416 | 0.464 | 0.388 | -0.834 | 0.577 | 1.029 |

Table 23: Simulation results of **HT** estimator under **multiplicative** model with resolution **10** on FB-Cornell5

| gamma<br>metric<br>method | 0.5    |       |       | 1.0    |       |       | 2.0    |       |       |
|---------------------------|--------|-------|-------|--------|-------|-------|--------|-------|-------|
|                           | Bias   | SD    | MSE   | Bias   | SD    | MSE   | Bias   | SD    | MSE   |
| <b>Ber</b>                | -0.348 | 0.275 | 0.197 | -0.710 | 0.299 | 0.595 | -1.477 | 0.365 | 2.317 |
| <b>CR</b>                 | -0.348 | 0.249 | 0.184 | -0.775 | 0.307 | 0.696 | -1.482 | 0.380 | 2.342 |
| <b>ReAR</b>               | -0.367 | 0.074 | 0.141 | -0.747 | 0.096 | 0.569 | -1.468 | 0.106 | 2.166 |
| <b>PSR</b>                | -0.363 | 0.125 | 0.148 | -0.748 | 0.137 | 0.579 | -1.492 | 0.175 | 2.257 |
| <b>IBR</b>                | -0.399 | 0.182 | 0.193 | -0.741 | 0.215 | 0.597 | -1.514 | 0.277 | 2.370 |
| <b>IBR-p</b>              | -0.389 | 0.173 | 0.181 | -0.755 | 0.188 | 0.606 | -1.489 | 0.231 | 2.273 |
| <b>OCD</b>                | -0.248 | 0.404 | 0.225 | -0.452 | 0.461 | 0.416 | -0.969 | 0.589 | 1.286 |

Table 24: Simulation results of **DIM** estimator under **multiplicative** model with resolution **10** on FB-Cornell5

| gamma<br>metric<br>method | 0.5    |       |       | 1.0    |       |       | 2.0    |       |       |
|---------------------------|--------|-------|-------|--------|-------|-------|--------|-------|-------|
|                           | Bias   | SD    | MSE   | Bias   | SD    | MSE   | Bias   | SD    | MSE   |
| <b>Ber</b>                | -0.336 | 0.320 | 0.216 | -0.758 | 0.399 | 0.734 | -1.468 | 0.482 | 2.389 |
| <b>CR</b>                 | -0.399 | 0.212 | 0.205 | -0.709 | 0.265 | 0.574 | -1.448 | 0.348 | 2.218 |
| <b>ReAR</b>               | -0.429 | 0.147 | 0.206 | -0.798 | 0.191 | 0.674 | -1.516 | 0.245 | 2.361 |
| <b>PSR</b>                | -0.368 | 0.132 | 0.153 | -0.743 | 0.157 | 0.578 | -1.489 | 0.187 | 2.255 |
| <b>IBR</b>                | -0.383 | 0.157 | 0.171 | -0.711 | 0.191 | 0.542 | -1.483 | 0.214 | 2.245 |
| <b>IBR-p</b>              | -0.372 | 0.157 | 0.164 | -0.751 | 0.201 | 0.605 | -1.468 | 0.227 | 2.207 |
| <b>OCD</b>                | -0.260 | 0.036 | 0.069 | -0.519 | 0.035 | 0.271 | -1.031 | 0.034 | 1.065 |

93 **References**

- 94 [1] Ozan Candogan, Chen Chen, and Rad Niazadeh. Correlated cluster-based randomized experi-  
95 ments: Robust variance minimization. *Chicago Booth Research Paper (21-17)*, 2021.
- 96 [2] Dean Eckles, Brian Karrer, and Johan Ugander. Design and analysis of experiments in networks:  
97 Reducing bias from interference. *Journal of Causal Inference*, 5(1):20150021, 2016.
- 98 [3] Yang Liu, Yifan Zhou, Ping Li, and Feifang Hu. Adaptive a/b test on networks with cluster  
99 structures. In *International Conference on Artificial Intelligence and Statistics*, pages 10836–  
100 10851. PMLR, 2022.
- 101 [4] Yichen Qin, Yang Li, Wei Ma, and Feifang Hu. Pairwise sequential randomization and its  
102 properties. *arXiv preprint arXiv:1611.02802*, 2016.
- 103 [5] Ryan A. Rossi and Nesreen K. Ahmed. The network data repository with interactive graph  
104 analytics and visualization. In *AAAI*, 2015.
- 105 [6] Johan Ugander and Hao Yin. Randomized graph cluster randomization. *arXiv preprint*  
106 *arXiv:2009.02297*, 2020.
