# Supplementary material
Source: ML conference proceedings conference paper supplement (https://openreview.net/forum?id=zQOYGDc9pu)

MSE of HT estimator under Multiplicative Potential Outcome Model (FB-Stanford3)

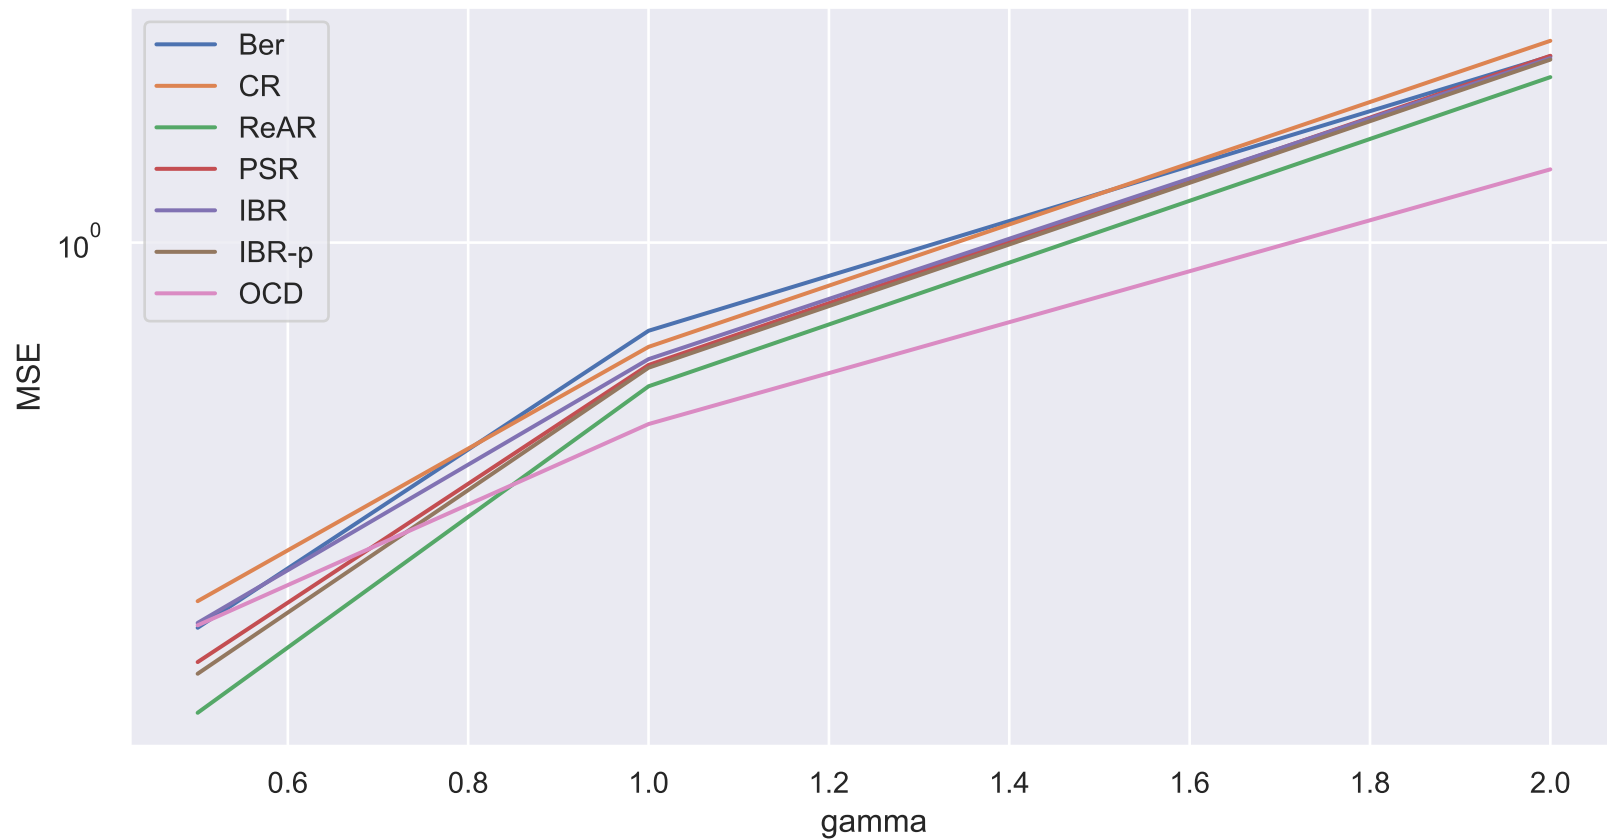

Supplement: supplementary_material [file attachment]

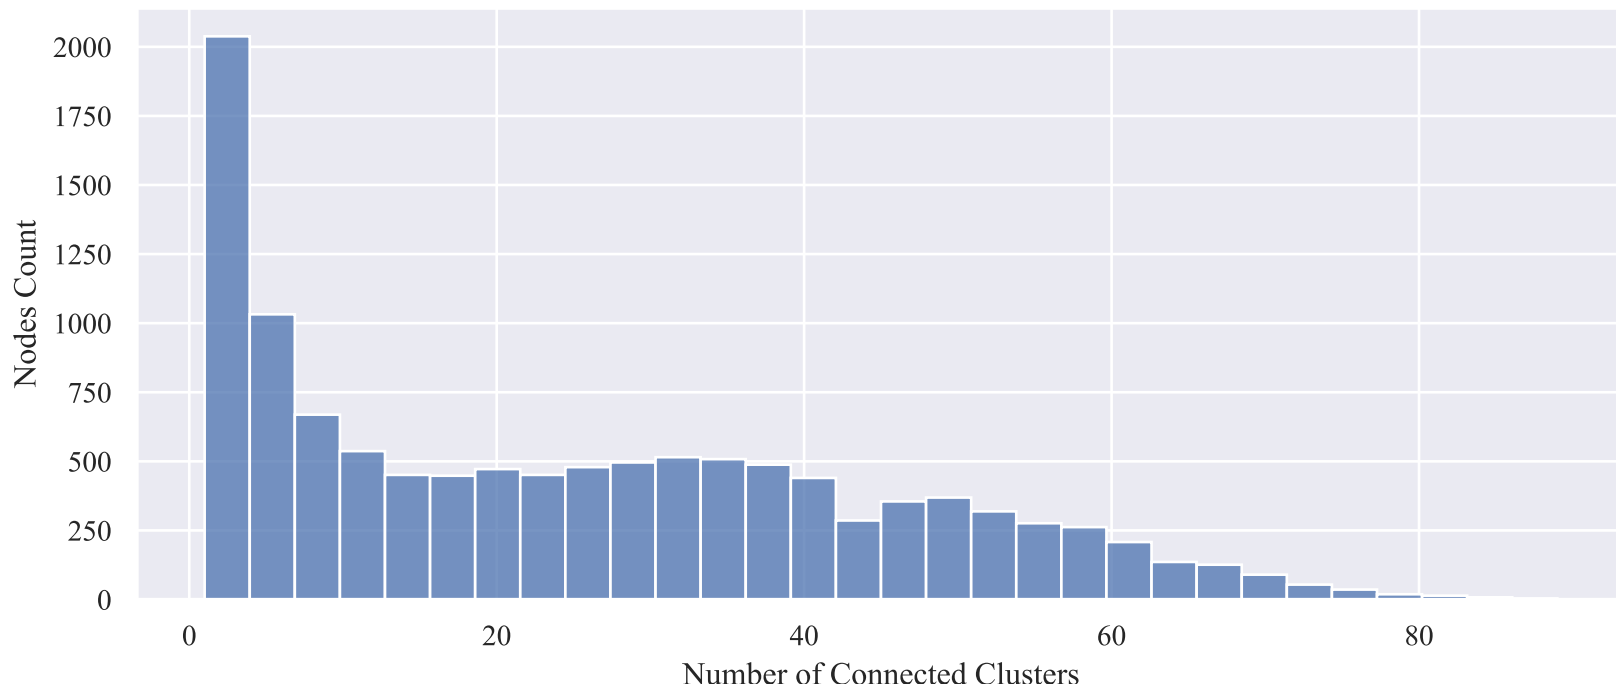

Supplement: supplementary_material [file attachment]

MSE of HT estimator under Linear Potential Outcome Model (FB-Stanford3)

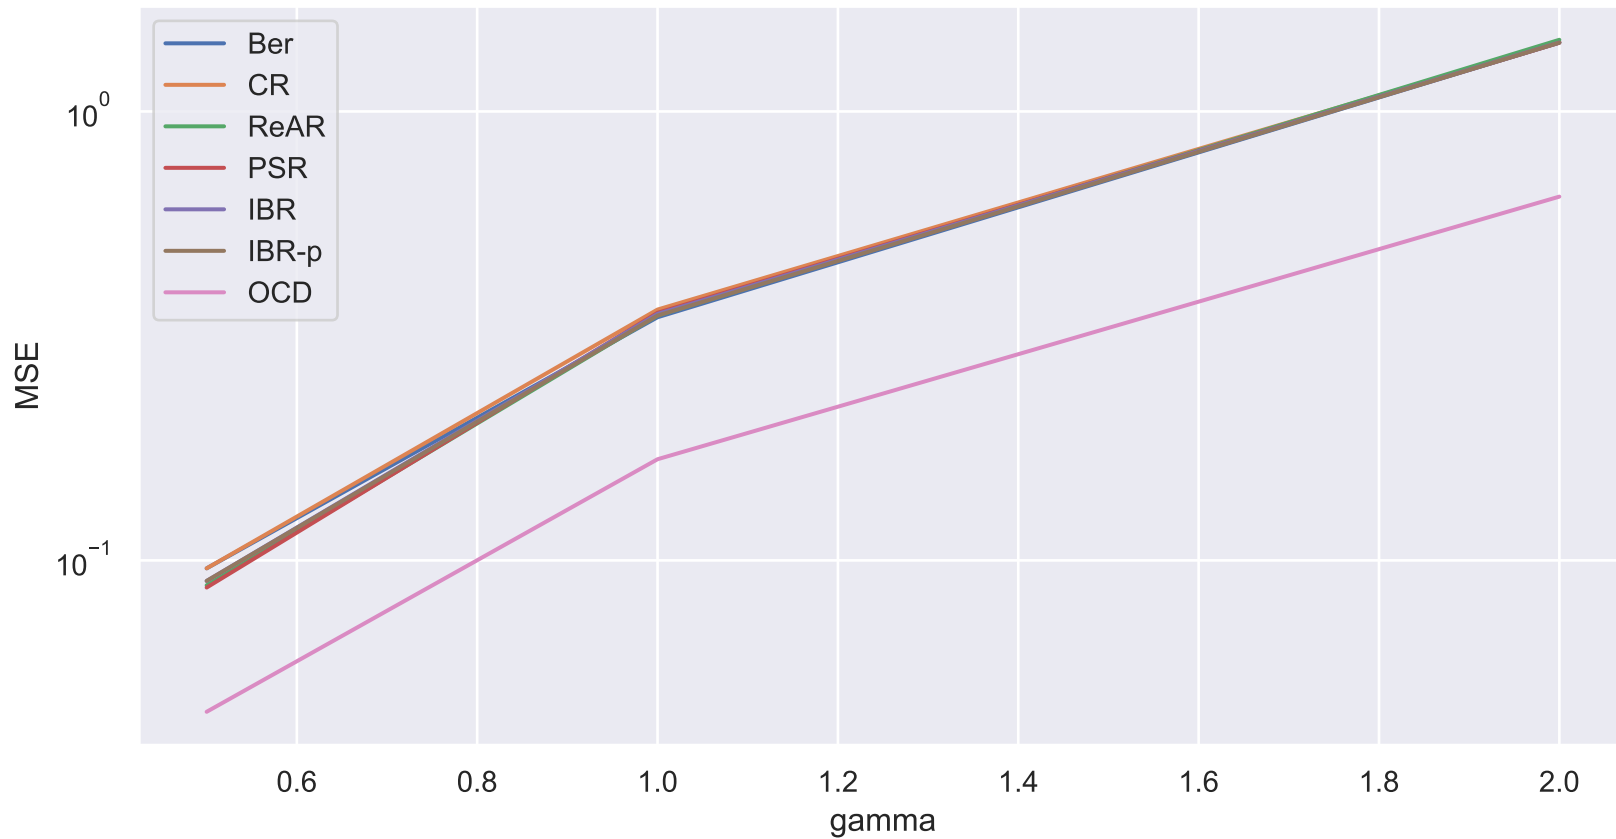

Supplement: supplementary_material [file attachment]
